# Supplementary material for: Comparison of long-term changes in size and longevity of bee colonies in mid-west Japan and Maui with and without exposure to pesticide, cold winters, and mites
Source: PeerJ. 2020 Jul 28;8:e9505. doi: 10.7717/peerj.9505 (PMC7394064; doi:10.7717/peerj.9505)
Supplement: Supplemental Information 6 [file peerj-08-9505-s006.xlsx]

## Sheet: Data S1
Data file for Figure S1
Date	2011/2012					2012/2013				2013/2014
	CR-1	DF				CR-1	CR-2	DF	FT	CR-1	CR-2	DF	CN	FT	MT
	pesticide-free	1 ppm/syrup	0.565 ppm/pollen	10 ppm/syrup	5.65 ppm/pollen	pesticide-free	pesticide-free	2ppm/syrup	10ppm/syrup	pesticide-free	pesticide-free	0.2ppm/syrup	0.08ppm/syrup	1ppm/syrup	1ppm/syrup
2011-06-28						19.03	14.49	15.86	17.95
2011-07-08						25.65	22.15	19.78	22.58
2011-07-09	7.38	8.8	10.68	10.75	3.45
2011-07-15						21.94	21.07	14.61	22.06
2011-07-16	14.85	12.64	18.59	3.59	0.89
2011-07-21						21.53	23.06	16.91	22.56
2011-07-22	14.59	16.75	17.45	5.88	1.62	21.12	20.76	6.11	16.76
2011-07-27						14.51	13.24	1.03	11.57
2011-07-28						13.79	13.15	1.9	9.52
2011-07-29	21.27	17.82	20.46	14.38	0.12
2011-08-03						15.41	13.52	5.15	12.31
2011-08-04						14.88	13.7	1.22	11.96
2011-08-06	21.89	19.66	20.21	19.78	3.02
2011-08-08						16.23	14.86	0.05	12.62
2011-08-12	22.26	23.55	20.77	24.85
2011-08-13										23.01	16.09	14.97	14.18	18.28	15.08
2011-08-16						18.39	15.6	0	18.86
2011-08-18	17.63	18.38	18.72	13.5
2011-08-24										21.26	16.32	20.76	17.43	23.08	18.65
2011-08-25						19.88	18.37		22.64	25.14	21.56	27.74	25.17	28.81	26.84
2011-08-26	15.17	11.42	18.63	11.99						27.73	26.86	30.73	28.67	22.27	29.32
2011-09-01										23.77	19.22	25.07	23.95	27.9	26.11
2011-09-05										25.14	21.56	27.74	25.17	28.81	26.84
2011-09-06						23	21.68		31.86
2011-09-10	18.82	9.73	26.34	22.46
2011-09-15						21.31	20.47		38.45
2011-09-17	15.75	14.26	30.04	26.76
2011-09-21						21	18.04		36.6	27.08	29.13	34.44	28.2	24.86	29.32
2011-09-24	16.44	17.39	29.47	17.9
2011-09-27										13.68	29.88	33.45	30.74	16.68	22.93
2011-09-29	16.37	13.06	29.54	19.94
2011-10-04										14.39	16.2	41.41	19.35	17.33	14.47
2011-10-05
2011-10-07	20.65	5.51	28.18	20.19
2011-10-13										20.18	20.63	31.82	27.41	22.14	18.9
2011-10-19						19.59	19.03		20.95
2011-10-21	23.79	1.53	22.4	28.4
2011-10-27										31.34	29.89	41.98	40.19	33.36	30.19
2011-10-30	26.73		25.3	35.46
2011-11-04	27.44		21.99	37.66
2011-11-15										48.37	48.19	60.17	56.81	51.13	47.95
2011-11-18	33.75		22.25	47.23
2011-11-25						47.53	37.74		45.86
2011-11-26	39.66		21.91	50.39
2011-12-01										62.34	63.18	74.23	70.46	66.43	62.35
2011-12-03	43.64		21.41	29.3
2011-12-13						64.81	51.75		62
2011-12-17	50.76		28.47	0.71
2012-01-05										92.61	95.6	0	0	100.39	92.97
2012-02-01						108.91	93.76		108.11
2012-02-07										3.81	127.15			124.23	0
2012-02-16	107.14		14.29
2012-02-28										0	147.03			0
2012-03-01						133.75	118.44		136.85
2012-03-09						141.82	124.67		145.9
2012-03-17						148.28	128.57		152.54
2012-03-23						154.08	131.34		157.36
2012-03-29						159.04	133.66		161.37
2012-04-02	133.1
2012-04-07						166.8	136.13		166.52
2012-04-13						172.59	138.63		172.62
2012-04-19						177.64	141.88		175.61
2012-04-26						181.88	38.93		37.89
2012-05-03						185.32	30.47		33.22
2012-05-10						34.93	28.37		20.6
2012-05-17						26.01	28.76		14.91
2012-05-26						22.57	17.5		12.86
2012-06-02						16.76	27.14		9.89
2012-06-14						11.18	26.34		10.49
2012-06-21						14.36	27.64		11.92
2012-06-28						12.24	31.03		12.21
2012-07-08						13.31	21.93		14.87
2012-07-26
Note (1): 2011/2012, 2012/2013 and 2013/2014 mean an experimental period from the stated year to the finished years, respectively.
Note (2): CR-1 and CR-2 mean a control (pesticide-free) colony. DF, CN, FT and MT mean dinotefuran, clothianidin, fenitrothion and malathion, respectively.
Note (3): x ppm/syrup and y ppm/pollen denote that an x ppm pesticide sugar syrup is administered to a bee colony and a y ppm pesticide pollen paste is administered to a bee colony, respectively.
Note (4): Experiments were conducted in Shika, mid-west Japan.
