# Supplementary material for: Comparison of long-term changes in size and longevity of bee colonies in mid-west Japan and Maui with and without exposure to pesticide, cold winters, and mites
Source: PeerJ. 2020 Jul 28;8:e9505. doi: 10.7717/peerj.9505 (PMC7394064; doi:10.7717/peerj.9505)
Supplement: Supplemental Information 7 [file peerj-08-9505-s007.xlsx]

## Sheet: Data S7
Data file for Figure S2
Month	Rainfall (mm)		Tav (℃)		Tmax (℃)		Tmin (℃)		Vav	Sun
	Shika	Maui	Shika	Maui	Shika	Maui	Shika	Maui	(m/s)	(hr)
January	154.4	94	3.2	22.6	6.7	27.4	-0.2	17.4	3.2	52.7
February	102.2	52	3.2	22.5	6.9	27.3	-0.6	17.7	2.9	79.2
March	101.6	78	5.8	22.8	10.1	27.6	1.1	17.9	2.8	136
April	101.5	30	11.1	22.9	16	27.8	5.7	18	2.7	184.4
May	119.8	12	15.8	23.8	20.6	28.7	10.8	18.8	2.4	195
June	163.7	2	20	24.8	24.5	30	15.8	19.6	2.1	150.2
July	208.7	5	24	25.7	28	31	20.5	20.4	2.1	150.4
August	142.1	12	26	25.9	30.5	31.3	21.9	20.6	2.1	207.8
September	173	4	21.7	26	26.4	31.8	17.5	20.3	2.2	146.1
October	129.1	29	15.9	25.4	21	30.9	11.1	19.9	2.3	149.4
November	168.8	87	10.7	24.2	15.2	29.1	6	19.3	2.9	96.4
December	176.1	74	6.2	22.8	10	27.7	2.3	17.8	3.3	59.4
